# Supplementary material for: Efficient non-aqueous solvent formed by 2-piperidineethanol and ethylene glycol for CO2 absorption
Source: Royal Society of Chemistry journal article supplement (doi:10.1039/c9cc06320j), 2019-01-01
Supplement: c9cc06320j1.pdf [file c9cc06320j1.pdf]

Supporting information

## Efficient non-aqueous solvent formed by 2-piperidineethanol and ethylene glycol for CO<sub>2</sub> absorption

Dezhong Yang,<sup>\*a</sup> Meng Lv,<sup>a</sup> Jie Chen<sup>a</sup>

<sup>a</sup>School of Science, China University of Geosciences, 100083 Beijing, China

Corresponding author:

Dezhong Yang, E-mail: yangdz@cugb.edu.cn

## **Experimental section**

### **Materials**

Ethylene glycol (99.5%) and 2-piperidineethanol (98%) were supplied by J&K Scientific Ltd. CO<sub>2</sub> ( $\geq 99.99\%$ ) and N<sub>2</sub> ( $\geq 99.99\%$ ) were provided by Beijing ZG Special Gases Sci. and Tech. Co. Ltd. Molecular sieves (4Å), used to dry ethylene glycol, were purchased from Alfa Aesar.

### **Characterizations**

A PerkinElmer Frontier spectrometer was used to record the FTIR spectrum of the absorbents before and after CO<sub>2</sub> absorption. A Bruker spectrometer was applied to record the <sup>1</sup>H NMR (600 MHz) and <sup>13</sup>C NMR(151 MHz) data using DMSO-d<sub>6</sub> as the external reference.

### **Preparation of the absorbents**

2-PE and EG were added into a glass vial (20 ml) at required molar ratio. Then, the vial was heated at 50 °C and the mixture in the vial was stirred until a homogenous solution was formed. Finally, the liquid absorbent can be obtained after the solution was cooled down to room temperature.

### **Uptake and release of CO<sub>2</sub>**

Glass tubes with an inner diameter of 10 mm were dried in an oven and then cooled down to room temperature before CO<sub>2</sub> uptake experiment. The liquid absorbent (~2.0 g) was loaded into the glass tube which was equipped with a rubber lid and two needles. One needle was long for CO<sub>2</sub> inlet and the other was short for CO<sub>2</sub> outlet. After that, the tube was partially immersed in a water bath of 25°C and CO<sub>2</sub> was bubbled into the solution (50 mL/min) through the long needle. The weight change of the tube after CO<sub>2</sub> uptake was determined by a digital balance.

After the uptake was finished, the tube was placed into a water bath of 50°C and N<sub>2</sub> was introduced the tube (60 mL/min) using the long needle. The weight decrease of the tube during desorption process was also determined by the balance.

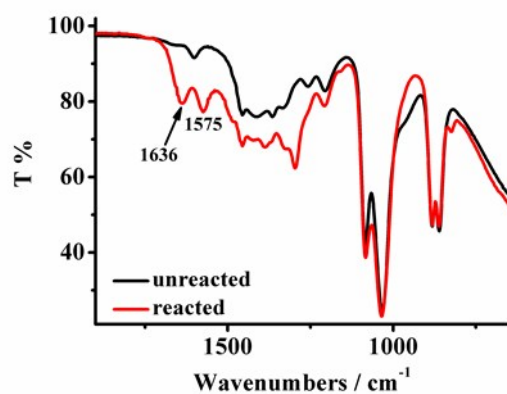

**Fig. S1** The FTIR spectrum of MEA:EG(1:6) before and after reaction with CO<sub>2</sub>.

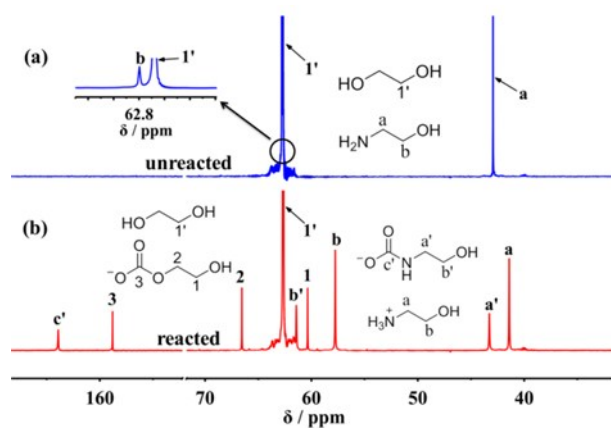

**Fig. S2** The NMR spectrum of MEA:EG(1:6) before and after reaction with CO<sub>2</sub>.

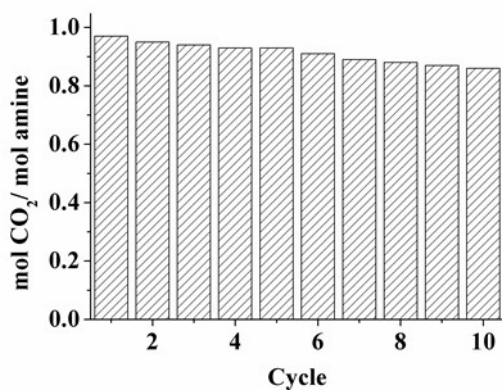

**Fig. S3** Ten absorption-desorption cycles by 2-PE:EG (1:6). Absorption: ◆, 25°C; Desorption: ◇, 50°C.
